# Supplementary material for: Secretagogin is expressed in sensory CGRP neurons and in spinal cord of mouse and complements other calcium-binding proteins, with a note on rat and human
Source: PubMed Central journal article supplement (PMC3560279; doi:10.1186/1744-8069-8-80), 2012-10-29

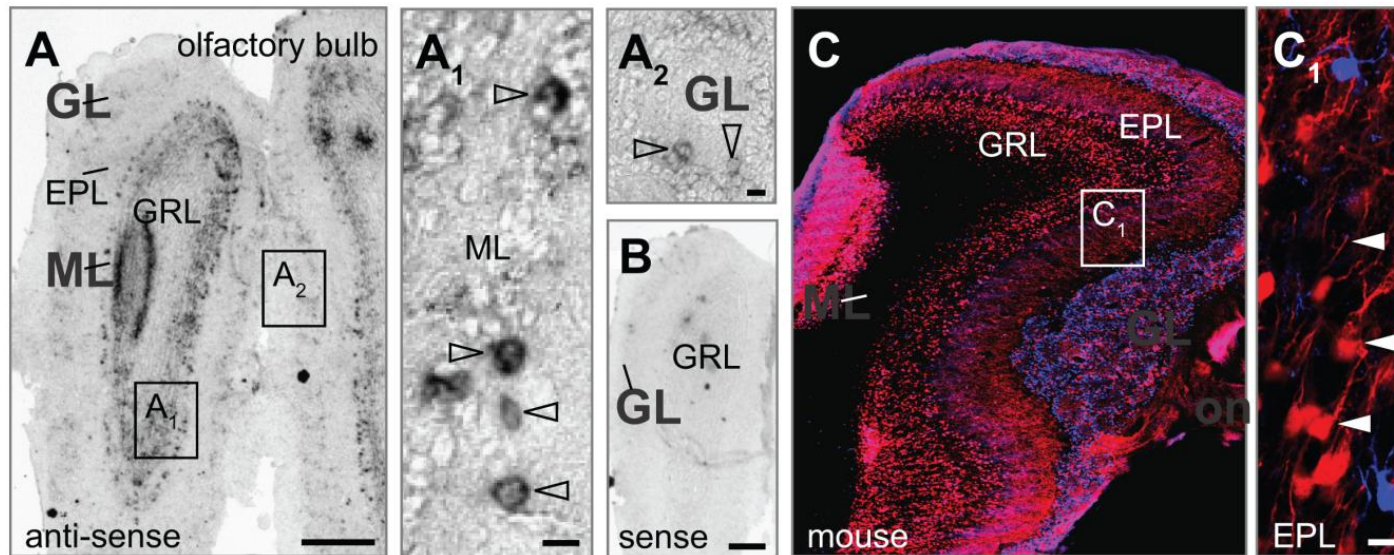

Supplement: 1744-8069-8-80-S1.pdf [file 1744-8069-8-80-S1.pdf]
